# Supplementary material for: High prevalence of peripheral and carotid artery disease in patients with interstitial lung diseases
Source: Atypon-hosted journal article supplement (doi:10.1024/0301-1526/a001068), 2023-03-28
Supplement: 0301-1526_a001068_esm1.pdf [file 0301-1526_a001068_esm1.pdf]

## Electronic supplementary material

### ESM 1. Classification of PAD according to Fontaine stages and Rutherford grades and categories

| Fontaine |                             | Rutherford |          |                                                                |
|----------|-----------------------------|------------|----------|----------------------------------------------------------------|
| Stage    | Clinical symptoms           | Grade      | Category | Clinical symptoms                                              |
| I        | Asymptomatic                | 0          | 0        | Asymptomatic                                                   |
| II a     | Walking distance > 200 m    | I          | 1        | Mild claudication                                              |
| II b     | Walking distance < 200 m    | I          | 2        | Moderate claudication                                          |
|          |                             | I          | 3        | Severe claudication                                            |
| III      | Rest pain                   | II         | 4        | Rest pain                                                      |
| IV       | Ischemic ulcers or gangrene | III        | 5        | Limited ischemic ulceration not exceeding ulcer of foot digits |
|          |                             | III        | 6        | Severe ischemic ulcers or frank gangrene                       |

Notes. Adapted from Naqvi and Lee [16]. PAD: peripheral artery disease.
