# Supplementary material for: High prevalence of peripheral and carotid artery disease in patients with interstitial lung diseases
Source: Atypon-hosted journal article supplement (doi:10.1024/0301-1526/a001068), 2023-03-28
Supplement: 0301-1526_a001068_esm4.pdf [file 0301-1526_a001068_esm4.pdf]

# Electronic supplementary material

## ESM 4. Lung functioning and six-minute-walking-exercise

|                                                    | PF-ILD (n = 49) | nPF-ILD (n = 48) | p <sup>a</sup> | Control (n = 30) | p <sup>b</sup> |
|----------------------------------------------------|-----------------|------------------|----------------|------------------|----------------|
| <b>Body plethysmography and CO-diffusion-tests</b> |                 |                  |                |                  |                |
| TLC [L]                                            | 4.93 ± 1.87     | 5.38 ± 1.25      | n.s.           | 6.45 ± 1.34      | <0.001         |
| TLC% [%]                                           | 78.2 ± 28.7     | 87.2 ± 15.9      | n.s.           | 103.6 ± 17.2     | <0.001         |
| VC [L]                                             | 2.46 ± 1.05     | 3.03 ± 0.90      | <0.01          | 3.78 ± 0.91      | <0.001         |
| VC [%]                                             | 66.9 ± 23.5     | 83.3 ± 31.1      | <0.01          | 98.5 ± 16.4      | <0.001         |
| RV% [%]                                            | 100.7 ± 62.4    | 108.8 ± 31.5     | n.s.           | 122.3 ± 28.6     | n.s.           |
| FEV1 [L/sec]                                       | 2.00 ± .80      | 2.36 ± 0.71      | n.s.           | 3.09 ± 0.73      | <0.001         |
| FEV1% [%]                                          | 69.3 ± 24.4     | 75.9 ± 17.7      | <0.05          | 98.7 ± 13.6      | <0.001         |
| FEV1/VC [%]                                        | 84.4 ± 11.1     | 80.8 ± 7.3       | n.s.           | 85.4 ± 7.5       | n.s.           |
| DLCO/SB% [%]                                       | 25.8 ± 15.9     | 44.0 ± 16.9      | <0.001         | 70.0 ± 13.1      | <0.001         |
| DLCO/VA% [%]                                       | 39.3 ± 20.5     | 60.8 ± 19.8      | <0.001         | 77.6 ± 17.3      | <0.001         |
| O <sub>2</sub> -Support (%)                        | 12 (31.6%)      | 2 (4.4%)         | <0.01          | 0 (0%)           | <0.001         |
| O <sub>2</sub> -Amount/min [L]                     | 0.81 ± 1.44     | 0.13 ± 0.66      | <0.01          | 0 ± 0            | <0.001         |
| <b>Six-minute walk test</b>                        |                 |                  |                |                  |                |
| <b>Pre-6MWT examinations</b>                       |                 |                  |                |                  |                |
| Pulse rate [1/min]                                 | 75 ± 16         | 82 ± 14          | n.s.           | 71 ± 12          | <0.05          |
| Breathing rate [1/min]                             | 20 ± 4          | 18 ± 3           | n.s.           | 15 ± 3           | <0.001         |
| Borg-Scale: Dyspnoea                               | 1.82 ± 1.71     | 1.45 ± 1.54      | n.s.           | 0.53 ± 0.70      | <0.05          |
| Borg-Scale: Exhaustion                             | 2.35 ± 2.26     | 1.48 ± 1.71      | n.s.           | 1.11 ± 2.11      | n.s.           |
| pH                                                 | 7.448 ± 0.036   | 7.454 ± 0.035    | n.s.           | 7.449 ± 0.030    | n.s.           |
| pCO <sub>2</sub> [mmHg]                            | 34.225 ± 4.880  | 33.545 ± 4.165   | n.s.           | 33.358 ± 3.800   | n.s.           |
| pO <sub>2</sub> [mmHg]                             | 70.068 ± 13.401 | 76.073 ± 11.584  | <0.05          | 79.384 ± 9.576   | <0.05          |
| 6MWT distance [m]                                  | 275 ± 178       | 434 ± 94         | <0.001         | 506 ± 97         | <0.001         |
| <b>Post-6MWT examinations</b>                      |                 |                  |                |                  |                |
| Pulse rate [1/min]                                 | 92 ± 19         | 101 ± 17         | <0.05          | 95 ± 20          | n.s.           |
| Breathing rate [1/min]                             | 27 ± 8          | 24 ± 5           | n.s.           | 20 ± 3           | <0.001         |
| Borg-Scale: Dyspnoea                               | 4.46 ± 1.60     | 3.16 ± 2.23      | <0.01          | 1.21 ± 1.13      | <0.001         |
| Borg-Scale: Exhaustion                             | 3.85 ± 2.18     | 2.87 ± 2.29      | n.s.           | 1.42 ± 2.17      | <0.01          |
| pH                                                 | 7.433 ± 0.044   | 7.430 ± 0.040    | n.s.           | 7.447 ± 0.043    | n.s.           |
| pCO <sub>2</sub> [mmHg]                            | 33.907 ± 5.297  | 34.963 ± 4.710   | n.s.           | 33.206 ± 3.677   | n.s.           |
| pO <sub>2</sub> [mmHg]                             | 73.270 ± 20.412 | 76.918 ± 13.318  | n.s.           | 89.628 ± 10.109  | <0.01          |
| pO <sub>2</sub> -deviation pre/post [mmHg]         | -0.941 ± 19.583 | 1.677 ± 9.207    | n.s.           | 10.244 ± 11.067  | <0.05          |

Notes. <sup>a</sup> PF-ILD vs. nPF-ILD; <sup>b</sup> overall intergroup difference. Abbreviations amended with “%” represent percentage of the predicted value. PF-ILD: progressive-fibrosing interstitial lung disease; nPF-ILD: non-progressive-fibrosing interstitial lung disease; TLC: total lung capacity; VC: vital capacity; RV: residual volume; FEV1: forced expiratory volume; FEV1/VC: Tiffeneau index; CO: carbon monoxide; DLCO/SB: CO-diffusion capacity; DLCO/VA: CO-diffusion transfer coefficient; 6MWT: Six-minute walk test; pCO<sub>2</sub>: carbon dioxide partial pressure; pO<sub>2</sub>: oxygen partial pressure.
